# Supplementary material
Source: publisher site journal article supplement (https://www.dovepress.com/article/237008)
Supplement: Supplementary file 1 [file get_supplementary_file.php]

## Supplementary data

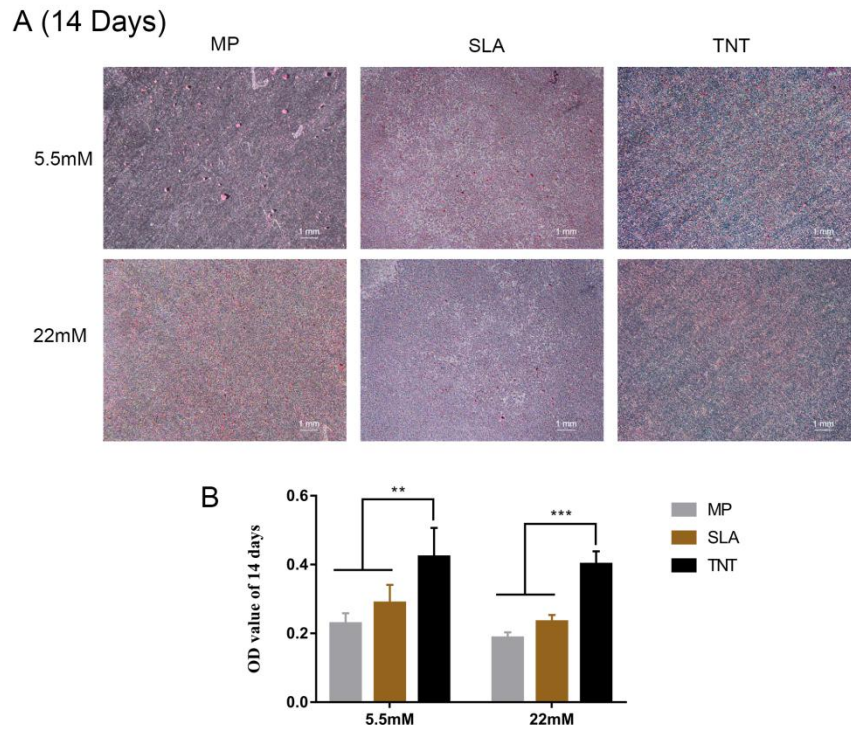

**Figure S1. High-glucose conditions inhibited osteogenesis on different modified Ti surfaces.** (A) The Alizarin Red staining on different modified Ti surfaces after osteogenic induction under high-glucose conditions for 14 days. (B) Semi-quantitative analysis of the Alizarin Red staining for 14 days. \*\* $p < 0.01$ , \*\*\* $p < 0.001$ .

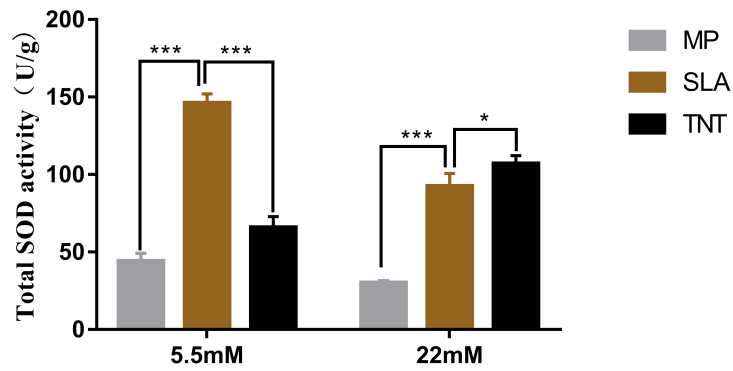

**Figure S2. Determination of the enzymatic activity of total SOD on different modified Ti surfaces.** The total SOD activity was detected by the Total Superoxide Dismutase Assay Kit. High-glucose conditions reduced the activity of total SOD on different modified Ti surfaces. Compared with the normal-glucose samples, the total SOD activity under high-glucose conditions increased in the TNT group, but decreased in the SLA group. \* $p < 0.05$ , \*\*\* $p < 0.001$ .
